# Supplementary material
Source: PubMed Central journal article supplement (PMC7673683)
Supplement: 68_2020_1548_MOESM1_ESM.pdf [file 68_2020_1548_MOESM1_ESM.pdf]

**Article Title:** Effectiveness of surgical fixation for rib fractures in relation to its timing: A retrospective Japanese nationwide study

**Journal name:** *European journal of Trauma and Emergency Surgery*

**Authors:** Shunichi Otaka, MD, Shotaro Aso, MD, MPH, PhD, Hiroki Matsui, MPH, Kiyohide Fushimi, MD, PhD, Hideo Yasunaga, MD, PhD

**Corresponding author:** Shunichi Otaka, MD, Department of Clinical Epidemiology and Health Economics, School of Public Health, University of Tokyo, 7-3-1 Hongo, Bunkyo-ku, Tokyo 113-0033, Japan, Phone: +81-3-5841-1887, Fax: +81-3-5841-1888,

E-mail: [shun-ky@umin.ac.jp](mailto:shun-ky@umin.ac.jp)

**Online Resource 1** Characteristics of patients according to surgical rib fixation status within 6 days after admission adjusted using overlap weights

| Variables                                       | Patients who did not<br>undergo surgical rib<br>fixation ≤ 6 days after<br>admission<br>(n=6,025) | Patients who<br>underwent surgical<br>rib fixation ≤ 6 days<br>after admission<br>(n=113) | Standardized<br>difference (%) |
|-------------------------------------------------|---------------------------------------------------------------------------------------------------|-------------------------------------------------------------------------------------------|--------------------------------|
| Age: years, mean                                | 67.5                                                                                              | 68.3                                                                                      |                                |
| Age groups: years, (%)                          |                                                                                                   |                                                                                           |                                |
| <60                                             | (20.3)                                                                                            | (20.3)                                                                                    | 0.0                            |
| 60–69                                           | (24.9)                                                                                            | (24.9)                                                                                    | 0.0                            |
| 70–79                                           | (31.4)                                                                                            | (31.4)                                                                                    | 0.0                            |
| 80≤                                             | (23.4)                                                                                            | (23.4)                                                                                    | 0.0                            |
| Sex (male), (%)                                 | (64.7)                                                                                            | (64.7)                                                                                    | 0.0                            |
| Body mass index: kg/m <sup>2</sup> , mean       | 22.3                                                                                              | 22.3                                                                                      |                                |
| Body mass index groups: kg/m <sup>2</sup> , (%) |                                                                                                   |                                                                                           |                                |
| <18.5                                           | (17.0)                                                                                            | (17.0)                                                                                    | 0.0                            |
| 18.5–24.9                                       | (58.0)                                                                                            | (58.0)                                                                                    | 0.0                            |
| 25–29.9                                         | (20.4)                                                                                            | (20.4)                                                                                    | 0.0                            |
| 30≤                                             | (4.6)                                                                                             | (4.6)                                                                                     | 0.0                            |
| Japan Coma Scale, (%)                           |                                                                                                   |                                                                                           |                                |
| 0 (alert)                                       | (43.7)                                                                                            | (43.7)                                                                                    | 0.0                            |
| 1–3 (dizziness)                                 | (20.0)                                                                                            | (20.0)                                                                                    | 0.0                            |
| 10–30 (somnia)                                  | (15.0)                                                                                            | (15.0)                                                                                    | 0.0                            |
| 100–300 (coma)                                  | (21.3)                                                                                            | (21.3)                                                                                    | 0.0                            |
| Comorbidities, (%)                              |                                                                                                   |                                                                                           |                                |
| Clinically important traumatic brain injury     | (14.9)                                                                                            | (14.9)                                                                                    | 0.0                            |
| Cervical fracture                               | (2.8)                                                                                             | (2.8)                                                                                     | 0.0                            |
| Vertebral fracture                              | (8.4)                                                                                             | (8.4)                                                                                     | 0.0                            |

|                                                   |        |        |     |
|---------------------------------------------------|--------|--------|-----|
| Clavicular fracture                               | (12.2) | (12.2) | 0.0 |
| Sternal fracture                                  | (9.0)  | (9.0)  | 0.0 |
| Scapular fracture                                 | (7.5)  | (7.5)  | 0.0 |
| Flail chest                                       | (19.2) | (19.2) | 0.0 |
| Pelvic fracture                                   | (6.2)  | (6.2)  | 0.0 |
| Procedures on admission, (%)                      |        |        |     |
| Catecholamine use                                 | (58.0) | (58.0) | 0.0 |
| Chest drainage                                    | (55.7) | (55.7) | 0.0 |
| Transfusion                                       | (69.9) | (69.9) | 0.0 |
| Transarterial embolization                        | (7.7)  | (7.7)  | 0.0 |
| Interventions for other organs, (%)               |        |        |     |
| Craniotomy                                        | (2.0)  | (2.0)  | 0.0 |
| Thoracotomy                                       | (18.3) | (18.3) | 0.0 |
| Laparotomy                                        | (5.8)  | (5.8)  | 0.0 |
| Pelvic ORIF, (%)                                  | (6.2)  | (6.2)  | 0.0 |
| Surgery to limbs, (%)                             | (15.2) | (15.2) | 0.0 |
| Charlson comorbidity index, (%)                   |        |        |     |
| 0                                                 | (87.4) | (87.4) | 0.0 |
| 1                                                 | (5.8)  | (5.8)  | 0.0 |
| 2                                                 | (4.0)  | (4.0)  | 0.0 |
| 3≤                                                | (2.9)  | (2.9)  | 0.0 |
| ICD-10 based severity score for trauma, mean (SD) | 8.9    | 8.9    | 0.0 |
| ICU admission, (%)                                | (91.3) | (91.3) | 0.0 |

---

ICD, International Classification of Diseases; ICU, intensive care unit; ORIF, open reduction and internal fixation; SD, standard deviation

**Online Resource 2** Duration of mechanical ventilation and length of hospital stay according to surgical rib fixation status within 6 days after admission adjusted using overlap weights

| Variables                          | Percent difference (%) | 95% confidence interval | <i>P</i> -value |
|------------------------------------|------------------------|-------------------------|-----------------|
| Duration of mechanical ventilation | -13.6                  | -30.7 to 7.6            | 0.19            |
| Length of hospital stay            | -8.4                   | -18.7 to 3.2            | 0.15            |

**Online Resource 3** Proportion with tracheostomy, post-admission pneumonia, and all-cause 28-day in-hospital mortality according to surgical rib fixation status within 6 days after admission adjusted using overlap weights

| Variables                              | Treated group | Untreated group | Risk difference | 95% confidence interval | <i>P</i> -value |
|----------------------------------------|---------------|-----------------|-----------------|-------------------------|-----------------|
| Tracheostomy                           | 0.29          | 0.28            | 0.01            | -0.08 to 0.10           | 0.80            |
| Pneumonia after admission              | 0.16          | 0.18            | -0.02           | -0.09 to 0.05           | 0.57            |
| All-cause 28-day in-hospital mortality | 0.03          | 0.05            | -0.02           | -0.05 to 0.01           | 0.23            |

**Online Resource 4** Characteristics of patients according to surgical rib fixation status within 10 days after admission after overlap weighting

| Variables                                       | Patients who did not<br>undergo surgical rib<br>fixation $\leq$ 10 days<br>after admission<br>(n=5,829) | Patients who<br>underwent surgical<br>rib fixation $\leq$ 10 days<br>after admission<br>(n=162) | Standardized<br>difference (%) |
|-------------------------------------------------|---------------------------------------------------------------------------------------------------------|-------------------------------------------------------------------------------------------------|--------------------------------|
| Age: years, mean                                | 68.3                                                                                                    | 68.5                                                                                            |                                |
| Age groups: years, (%)                          |                                                                                                         |                                                                                                 |                                |
| <60                                             | (19.9)                                                                                                  | (19.9)                                                                                          | 0.0                            |
| 60–69                                           | (23.3)                                                                                                  | (23.3)                                                                                          | 0.0                            |
| 70–79                                           | (29.7)                                                                                                  | (29.7)                                                                                          | 0.0                            |
| 80 $\leq$                                       | (27.1)                                                                                                  | (27.1)                                                                                          | 0.0                            |
| Sex (male), (%)                                 | (61.3)                                                                                                  | (61.3)                                                                                          | 0.0                            |
| Body mass index: kg/m <sup>2</sup> , mean       | 22.6                                                                                                    | 22.7                                                                                            |                                |
| Body mass index groups: kg/m <sup>2</sup> , (%) |                                                                                                         |                                                                                                 |                                |
| <18.5                                           | (14.1)                                                                                                  | (14.1)                                                                                          | 0.0                            |
| 18.5–24.9                                       | (59.7)                                                                                                  | (59.7)                                                                                          | 0.0                            |
| 25–29.9                                         | (21.5)                                                                                                  | (21.5)                                                                                          | 0.0                            |
| 30 $\leq$                                       | (4.6)                                                                                                   | (4.6)                                                                                           | 0.0                            |
| Japan Coma Scale, (%)                           |                                                                                                         |                                                                                                 |                                |
| 0 (alert)                                       | (38.9)                                                                                                  | (38.9)                                                                                          | 0.0                            |
| 1–3 (dizziness)                                 | (21.6)                                                                                                  | (21.6)                                                                                          | 0.0                            |
| 10–30 (somnia)                                  | (18.4)                                                                                                  | (18.4)                                                                                          | 0.0                            |
| 100–300 (coma)                                  | (21.1)                                                                                                  | (21.1)                                                                                          | 0.0                            |
| Comorbidities, (%)                              |                                                                                                         |                                                                                                 |                                |
| Clinically important traumatic brain injury     | (14.9)                                                                                                  | (14.9)                                                                                          | 0.0                            |
| Cervical fracture                               | (2.7)                                                                                                   | (2.7)                                                                                           | 0.0                            |
| Vertebral fracture                              | (8.7)                                                                                                   | (8.7)                                                                                           | 0.0                            |

|                                              |        |        |     |
|----------------------------------------------|--------|--------|-----|
| Clavicular fracture                          | (13.6) | (13.6) | 0.0 |
| Sternal fracture                             | (7.9)  | (7.9)  | 0.0 |
| Scapular fracture                            | (6.7)  | (6.7)  | 0.0 |
| Flail chest                                  | (16.9) | (16.9) | 0.0 |
| Pelvic fracture                              | (14.9) | (14.9) | 0.0 |
| Procedures on admission, (%)                 |        |        |     |
| Catecholamine use                            | (54.2) | (54.2) | 0.0 |
| Chest drainage                               | (58.6) | (58.6) | 0.0 |
| Transfusion                                  | (72.0) | (72.0) | 0.0 |
| Transarterial embolization,                  | (8.9)  | (8.9)  | 0.0 |
| Interventions for other organs, (%)          |        |        |     |
| Craniotomy                                   | (2.1)  | (2.1)  | 0.0 |
| Thoracotomy                                  | (15.9) | (15.9) | 0.0 |
| Laparotomy                                   | (6.9)  | (6.9)  | 0.0 |
| Pelvic ORIF                                  | (5.0)  | (5.0)  | 0.0 |
| Surgery to limbs                             | (13.4) | (13.4) | 0.0 |
| Charlson comorbidity index, (%)              |        |        |     |
| 0                                            | (80.5) | (80.5) | 0.0 |
| 1                                            | (10.8) | (10.8) | 0.0 |
| 2                                            | (6.7)  | (6.7)  | 0.0 |
| 3≤                                           | (2.1)  | (2.1)  | 0.0 |
| ICD-10 based severity score for trauma, mean | 9.2    | 9.2    | 0.0 |
| ICU admission, (%)                           | (92.4) | (92.4) | 0.0 |

---

ICD, International Classification of Diseases; ICU, intensive care unit; ORIF, open reduction and internal fixation; SD, standard deviation

**Online Resource 5** Duration of mechanical ventilation and length of hospital stay according to surgical rib fixation status within 10 days after admission adjusted using overlap weights

| Variables                          | Percent difference (%) | 95% confidence interval | <i>P</i> -value |
|------------------------------------|------------------------|-------------------------|-----------------|
| Duration of mechanical ventilation | 13.3                   | -5.6 to 35.9            | 0.18            |
| Length of hospital stay            | 0.3                    | -9.2 to 10.7            | 0.96            |



**Online Resource 6** Proportion with tracheostomy, post-admission pneumonia, and all-cause 28-day in-hospital mortality according to surgical rib fixation status within 10 days after admission adjusted using overlap weights

| Variables                              | Treated group | Untreated group | Risk difference | 95% confidence interval | <i>P</i> -value |
|----------------------------------------|---------------|-----------------|-----------------|-------------------------|-----------------|
| Tracheostomy                           | 0.34          | 0.28            | 0.06            | -0.02 to 0.14           | 0.15            |
| Pneumonia after admission              | 0.19          | 0.18            | 0.01            | -0.06 to 0.07           | 0.81            |
| All-cause 28-day in-hospital mortality | 0.02          | 0.05            | -0.01           | -0.04 to 0.01           | 0.26            |

**Online Resource 7** Duration of mechanical ventilation and length of hospital stay according to surgical rib fixation status within 3 days after admission adjusted using overlap weights (without transforming these values into natural logarithms)

| Variables                                 | Treated group | Untreated group | Difference | 95% confidence interval |         | <i>P</i> -value |
|-------------------------------------------|---------------|-----------------|------------|-------------------------|---------|-----------------|
| Duration of mechanical ventilation (days) | 7.5           | 14.1            | -6.6       | -9.2                    | to -4.0 | <0.001          |
| Length of hospital stay (days)            | 38.0          | 52.7            | -14.7      | -27.9                   | to -1.5 | 0.03            |

**Online Resource 8** Duration of mechanical ventilation and length of hospital stay according to surgical rib fixation status within 6 days after admission adjusted using overlap weights (without transforming these values into natural logarithms)

| Variables                                 | Treated group | Untreated group | Difference | 95% confidence interval |    |      | <i>P</i> -value |
|-------------------------------------------|---------------|-----------------|------------|-------------------------|----|------|-----------------|
| Duration of mechanical ventilation (days) | 11.8          | 15.0            | -3.2       | -5.8                    | to | -0.7 | 0.01            |
| Length of hospital stay (days)            | 42.3          | 52.4            | -10.1      | -19.1                   | to | -1.1 | 0.03            |

**Online Resource 9** Duration of mechanical ventilation and length of hospital stay according to surgical rib fixation status within 10 days after admission adjusted using overlap weights (without transforming these values into natural logarithms)

| Variables                                 | Treated group | Untreated group | Difference | 95% confidence interval |    |     | <i>P</i> -value |
|-------------------------------------------|---------------|-----------------|------------|-------------------------|----|-----|-----------------|
| Duration of mechanical ventilation (days) | 15.1          | 14.9            | 0.3        | -2.4                    | to | 2.9 | 0.85            |
| Length of hospital stay (days)            | 47.2          | 53.4            | -6.2       | -16.5                   | to | 4.1 | 0.24            |

**Online Resource 10** Duration of mechanical ventilation and length of hospital stay according to surgical rib fixation status within 3 days after admission adjusted using overlap weights (excluding patients with clinically important traumatic brain injury, cervical fracture, craniotomy on admission, and spinal fusion on admission)

| Variables                          | Percent difference (%) | 95% confidence interval | <i>P</i> -value |
|------------------------------------|------------------------|-------------------------|-----------------|
| Duration of mechanical ventilation | -42.3                  | -58.8 to -19.1          | 0.001           |
| Length of hospital stay            | -23.0                  | -35.6 to -7.9           | 0.004           |

**Online Resource 11** Proportion of tracheostomy, post-admission pneumonia and all-cause 28-day in-hospital mortality according to surgical rib fixation status within 3 days after admission adjusted using overlap weights (excluding patients with clinically important traumatic brain injury, cervical fracture, craniotomy on admission, and spinal fusion on admission)

| Variables                              | Treated group | Untreated group | Risk difference | 95% confidence interval | <i>P</i> -value |
|----------------------------------------|---------------|-----------------|-----------------|-------------------------|-----------------|
| Tracheostomy                           | 0.16          | 0.21            | -0.06           | -0.17 to 0.55           | 0.32            |
| Pneumonia after admission              | 0.11          | 0.15            | -0.04           | -0.14 to 0.05           | 0.39            |
| All-cause 28-day in-hospital mortality | 0.04          | 0.04            | 0.00            | -0.06 to 0.06           | 0.97            |

**Online Resource 12** Duration of mechanical ventilation and length of hospital stay according to surgical rib fixation status within 6 days after admission adjusted using overlap weights (excluding patients with clinically important traumatic brain injury, cervical fracture, craniotomy on admission, and spinal fusion on admission)

| Variables                          | Percent difference (%) | 95% confidence interval | <i>P</i> -value |
|------------------------------------|------------------------|-------------------------|-----------------|
| Duration of mechanical ventilation | -11.1                  | -30.7 to 14.2           | 0.36            |
| Length of hospital stay            | -9.1                   | -20.8 to 4.3            | 0.17            |

**Online Resource 13** Proportion of tracheostomy, post-admission pneumonia and all-cause 28-day in-hospital mortality according to surgical rib fixation status within 6 days after admission adjusted using overlap weights (excluding patients with clinically important traumatic brain injury, cervical fracture, craniotomy on admission, and spinal fusion on admission)

| Variables                              | Treated group | Untreated group | Risk difference | 95% confidence interval | <i>P</i> -value |
|----------------------------------------|---------------|-----------------|-----------------|-------------------------|-----------------|
| Tracheostomy                           | 0.27          | 0.25            | 0.02            | -0.08 to 0.12           | 0.64            |
| Pneumonia after admission              | 0.15          | 0.17            | -0.16           | -0.09 to 0.06           | 0.68            |
| All-cause 28-day in-hospital mortality | 0.04          | 0.04            | 0.00            | -0.05 to 0.04           | 0.84            |



**Online Resource 14** Duration of mechanical ventilation and length of hospital stay according to surgical rib fixation status within 10 days after admission adjusted using overlap weights (excluding patients with clinically important traumatic brain injury, cervical fracture, craniotomy on admission, and spinal fusion on admission)

| Variables                          | Percent difference (%) | 95% confidence interval | <i>P</i> -value |
|------------------------------------|------------------------|-------------------------|-----------------|
| Duration of mechanical ventilation | 16.7                   | -5.0 to 43.3            | 0.14            |
| Length of hospital stay            | 0.8                    | -10.1 to 13.1           | 0.89            |

**Online Resource 15** Proportion of tracheostomy, post-admission pneumonia and all-cause 28-day in-hospital mortality according to surgical rib fixation status within 10 days after admission adjusted using overlap weights (excluding patients with clinically important traumatic brain injury, cervical fracture, craniotomy on admission, and spinal fusion on admission)

| Variables                              | Treated group | Untreated group | Risk difference | 95% confidence interval | <i>P</i> -value |
|----------------------------------------|---------------|-----------------|-----------------|-------------------------|-----------------|
| Tracheostomy                           | 0.34          | 0.25            | 0.09            | 0.00 to 0.17            | 0.05            |
| Pneumonia after admission              | 0.18          | 0.16            | 0.01            | -0.06 to 0.08           | 0.70            |
| All-cause 28-day in-hospital mortality | 0.02          | 0.03            | -0.01           | -0.04 to 0.01           | 0.40            |

**Online Resource 16** Duration of mechanical ventilation and length of hospital stay according to surgical rib fixation status within 3 days after admission adjusted using overlap weights (patients without frail chest)

| Variables                          | Percent difference (%) | 95% confidence interval | <i>P</i> -value |
|------------------------------------|------------------------|-------------------------|-----------------|
| Duration of mechanical ventilation | -47.0                  | -60.7 to -28.6          | <0.001          |
| Length of hospital stay            | -21.1                  | -34.0 to -5.7           | 0.009           |

**Online Resource 17** Proportion of tracheostomy, post-admission pneumonia and all-cause 28-day in-hospital mortality according to surgical rib fixation status within 3 days after admission adjusted using overlap weights (patients without frail chest)

| Variables                              | Treated group | Untreated group | Risk difference | 95% confidence interval | <i>P</i> -value |
|----------------------------------------|---------------|-----------------|-----------------|-------------------------|-----------------|
| Tracheostomy                           | 0.19          | 0.23            | -0.05           | -0.16 to 0.07           | 0.44            |
| Pneumonia after admission              | 0.10          | 0.17            | -0.06           | -0.15 to 0.03           | 0.17            |
| All-cause 28-day in-hospital mortality | 0.04          | 0.06            | -0.02           | -0.08 to 0.04           | 0.50            |

**Online Resource 18** Duration of mechanical ventilation and length of hospital stay according to surgical rib fixation status within 6 days after admission adjusted using overlap weights (patients without frail chest)

| Variables                          | Percent difference (%) | 95% confidence interval | <i>P</i> -value |
|------------------------------------|------------------------|-------------------------|-----------------|
| Duration of mechanical ventilation | -19.0                  | -36.4 to 3.2            | 0.09            |
| Length of hospital stay            | -12.7                  | -23.5 to -0.4           | 0.04            |

**Online Resource 19** Proportion of tracheostomy, post-admission pneumonia and all-cause 28-day in-hospital mortality according to surgical rib fixation status within 6 days after admission adjusted using overlap weights (patients without frail chest)

| Variables                              | Treated group | Untreated group | Risk difference | 95% confidence interval | <i>P</i> -value |
|----------------------------------------|---------------|-----------------|-----------------|-------------------------|-----------------|
| Tracheostomy                           | 0.24          | 0.26            | -0.02           | -0.11 to 0.07           | 0.68            |
| Pneumonia after admission              | 0.13          | 0.17            | -0.04           | -0.12 to 0.03           | 0.26            |
| All-cause 28-day in-hospital mortality | 0.04          | 0.05            | -0.02           | -0.06 to 0.03           | 0.46            |

**Online Resource 20** Duration of mechanical ventilation and length of hospital stay according to surgical rib fixation status within 10 days after admission adjusted using overlap weights (patients without frail chest)

| Variables                          | Percent difference (%) | 95% confidence interval | <i>P</i> -value |
|------------------------------------|------------------------|-------------------------|-----------------|
| Duration of mechanical ventilation | 12.0                   | -8.6 to 37.3            | 0.27            |
| Length of hospital stay            | -2.7                   | -12.7 to 8.5            | 0.63            |

**Online Resource 21** Proportion of tracheostomy, post-admission pneumonia and all-cause 28-day in-hospital mortality according to surgical rib fixation status within 10 days after admission adjusted using overlap weights (patients without frail chest)

| Variables                              | Treated group | Untreated group | Risk difference | 95% confidence interval | <i>P</i> -value |
|----------------------------------------|---------------|-----------------|-----------------|-------------------------|-----------------|
| Tracheostomy                           | 0.32          | 0.27            | 0.05            | -0.04 to 0.13           | 0.28            |
| Pneumonia after admission              | 0.17          | 0.18            | 0.00            | -0.07 to 0.06           | 0.91            |
| All-cause 28-day in-hospital mortality | 0.02          | 0.03            | -0.01           | -0.03 to 0.02           | 0.64            |
